# Supplementary material for: Limited Association Between Body Mass Index and Selected Components of Physical Fitness in Higher Education Physical Education Students: A Sex- and Country-Specific Analysis
Source: MDPI journal article supplement (doi:10.3390/sports14050167), 2026-04-22
Supplement: s1 [file sports-4232585-supplementary.pdf › sports-4232585-supplementary.pdf]

**Table S1.** Regression coefficients ( $\beta$ ), 95% confidence intervals (CI), and p-values for BMI, BMI<sup>2</sup>, sex, country, and interaction terms.

| Outcome           | Predictor                            | $\beta$ | 95% CI           | p      |
|-------------------|--------------------------------------|---------|------------------|--------|
| Plate Tapping [s] | Intercept                            | 10.417  | (10.18, 10.65)   | <0.001 |
|                   | Sex_cat [Male]                       | -0.53   | (-0.78, -0.28)   | <0.001 |
|                   | Country_cat [Romania]                | -1.293  | (-1.49, -1.10)   | <0.001 |
|                   | BMI_c                                | 0.005   | (-0.08, 0.09)    | 0.909  |
|                   | BMI_c <sup>2</sup>                   | 0       | (-0.01, 0.01)    | 0.999  |
|                   | BMI_c $\times$ Sex_cat [Male]        | 0.053   | (-0.04, 0.15)    | 0.286  |
|                   | BMI_c $\times$ Country_cat [Romania] | -0.066  | (-0.13, 0.00)    | 0.057  |
| Sit-Ups [30 s]    | Intercept                            | 27.202  | (26.37, 28.03)   | <0.001 |
|                   | Sex_cat [Male]                       | 4.079   | (3.21, 4.94)     | <0.001 |
|                   | Country_cat [Romania]                | -6.029  | (-6.72, -5.34)   | <0.001 |
|                   | BMI_c                                | -0.03   | (-0.32, 0.26)    | 0.841  |
|                   | BMI_c <sup>2</sup>                   | 0.014   | (-0.02, 0.04)    | 0.382  |
|                   | BMI_c $\times$ Sex_cat [Male]        | -0.108  | (-0.45, 0.23)    | 0.532  |
|                   | BMI_c $\times$ Country_cat [Romania] | -0.061  | (-0.30, 0.18)    | 0.616  |
| Long Jump [cm]    | Intercept                            | 191.349 | (187.05, 195.64) | <0.001 |
|                   | Sex_cat [Male]                       | 53.067  | (48.59, 57.54)   | <0.001 |
|                   | Country_cat [Romania]                | -11.788 | (-15.34, -8.23)  | <0.001 |
|                   | BMI_c                                | -1.614  | (-3.14, -0.09)   | 0.038  |
|                   | BMI_c <sup>2</sup>                   | -0.138  | (-0.30, 0.02)    | 0.086  |
|                   | BMI_c $\times$ Sex_cat [Male]        | 0.686   | (-1.07, 2.45)    | 0.444  |
|                   | BMI_c $\times$ Country_cat [Romania] | 0.762   | (-0.47, 2.00)    | 0.226  |

Explanations:  $\beta$  – regression coefficient; CI – confidence interval; BMI\_c – body mass index centered around the sample mean; BMI\_c<sup>2</sup> – quadratic term of BMI used to test nonlinear relationships; Sex\_cat – categorical variable (reference: female); Country\_cat – categorical variable (reference: Poland); BMI\_c  $\times$  Sex\_cat and BMI\_c  $\times$  Country\_cat – interaction terms between BMI and sex and country, respectively.
